# Supplementary material for: On the origin of the spontaneous formation of nanocavities in hexagonal bronzes (W,V)O3
Source: Royal Society of Chemistry journal article supplement (doi:10.1039/c4dt01465k), 2014-01-01
Supplement: c4dt01465k1.pdf [file c4dt01465k1.pdf]

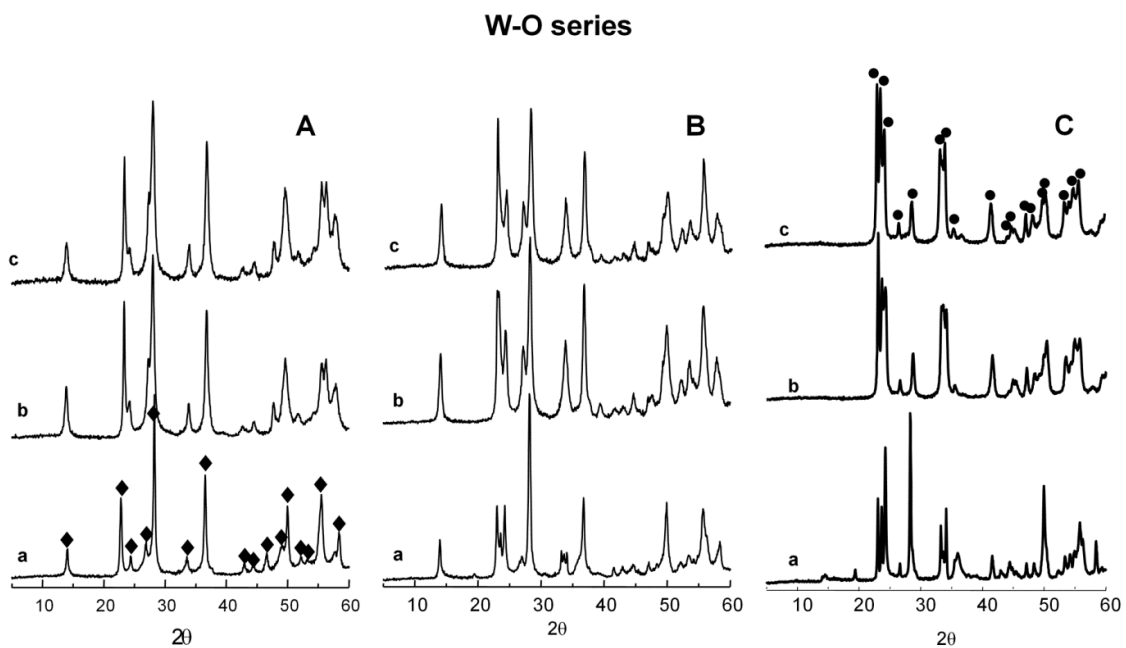

Figure S1. Powder XRD patterns of W-O series: pristine samples (A), samples calcined at 450 °C (B) and samples calcined at 600 °C (C). On each series, (a), (b) and (c) refers to (Na)W-O, (NH<sub>4</sub>)W-O and (Na/NH<sub>4</sub>)W-O materials, respectively. Symbols: (♦) h-WO<sub>3</sub>, (●) m-WO<sub>3</sub>.

### W/V-O series

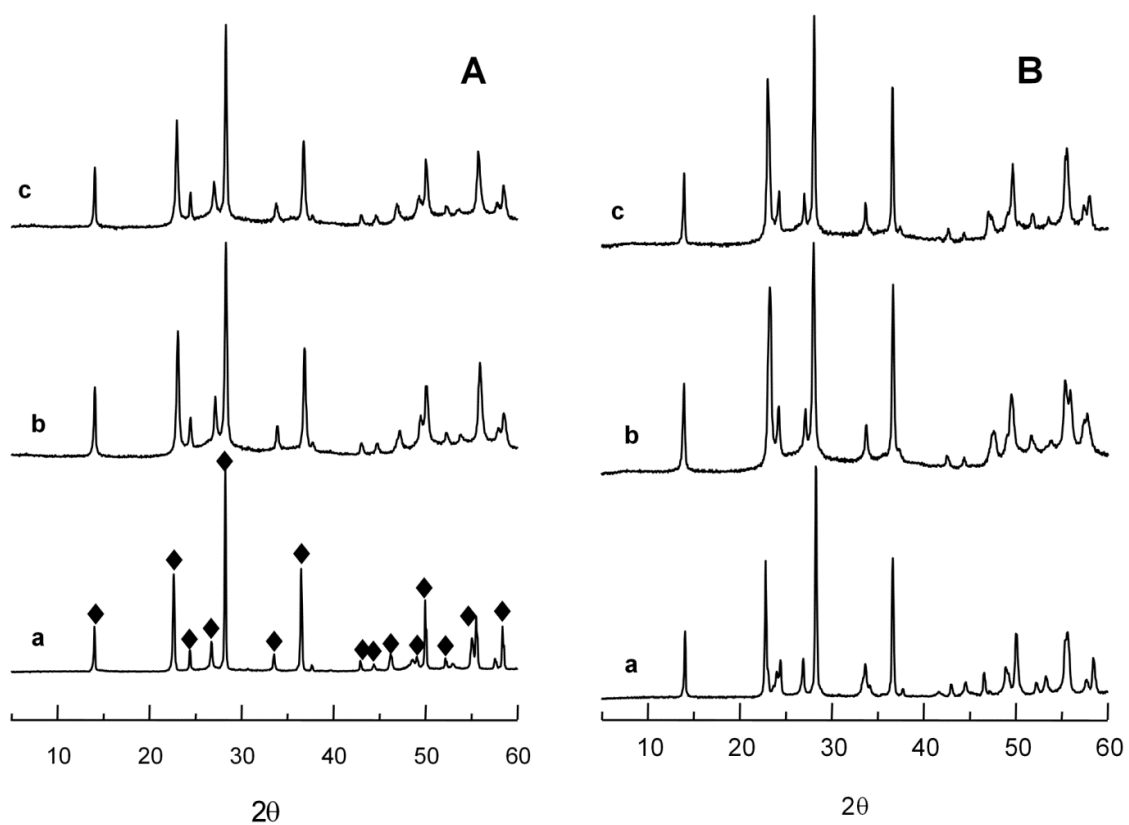

Figure S2. Powder XRD patterns of W/V-O series: pristine samples (A) and samples calcined at 600° C (B). On each series, (a), (b) and (c) refers to (Na)W/V-O, (NH<sub>4</sub>)W/V-O and (Na/NH<sub>4</sub>)W/V-O materials, respectively. Symbol: ( $\blacklozenge$ )  $h\text{-WO}_3$ .

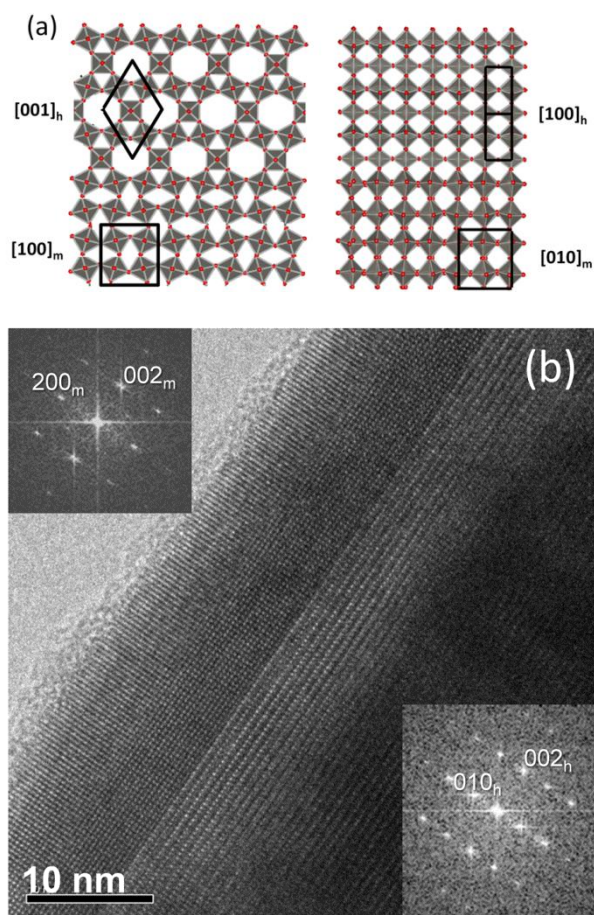

Figure S3. (a) Schematic representation illustrating the intergrowth of  $h$ - $\text{WO}_3$  and  $m$ - $\text{WO}_3$  in two different projections. (b) High resolution electron micrograph of a crystal in the  $[100]_h$  projection. The change of contrast in the crystal edge corresponds to the transformation to  $m$ - $\text{WO}_3$  in the  $[010]$  projection. Similarity between  $d_{001}$  for the two structures provide a good basis for the intergrowth of both polymorphs. The corresponding Fourier Transforms of each area have been included to illustrate the origin of the different diffraction effects.

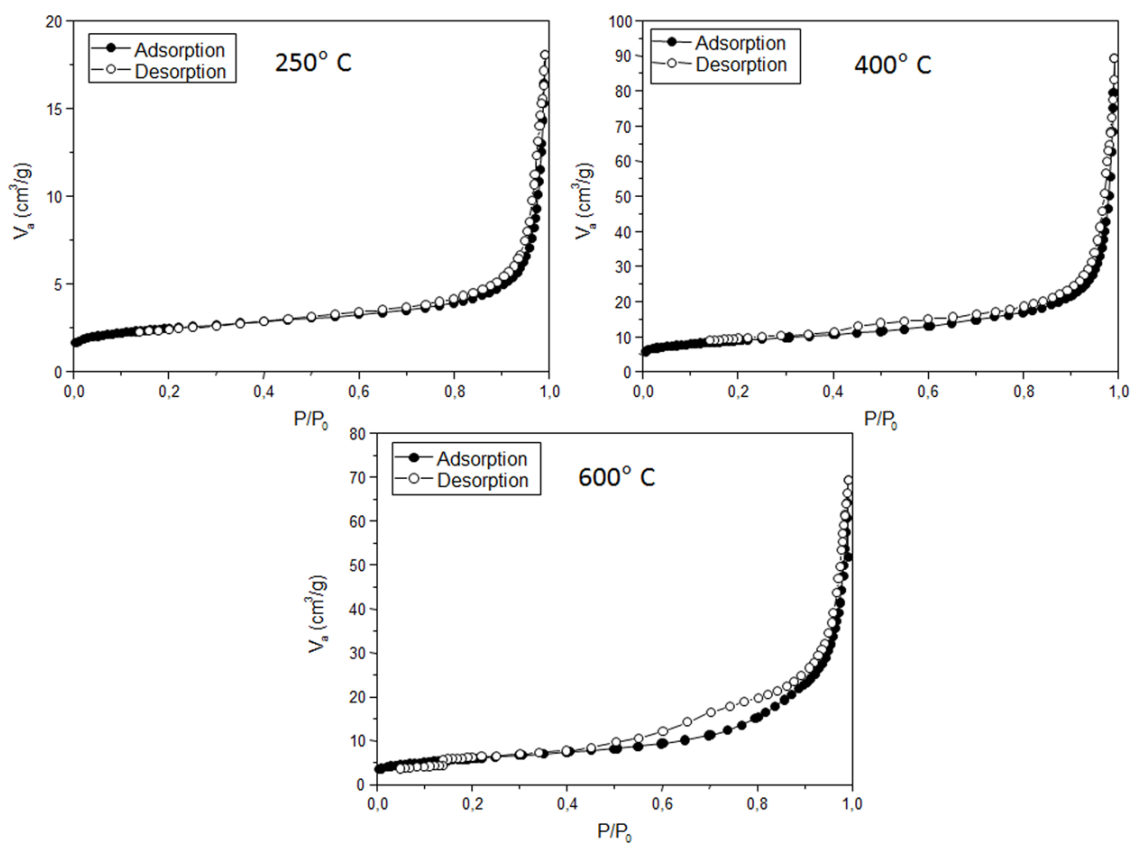

Figure S4. Nitrogen ( $\text{N}_2$ ) adsorption–desorption isotherms of  $(\text{NH}_4^+)\text{W/V-O}$  heated at (a) 250 °C, (b) 400 °C and (c) 600 °C.

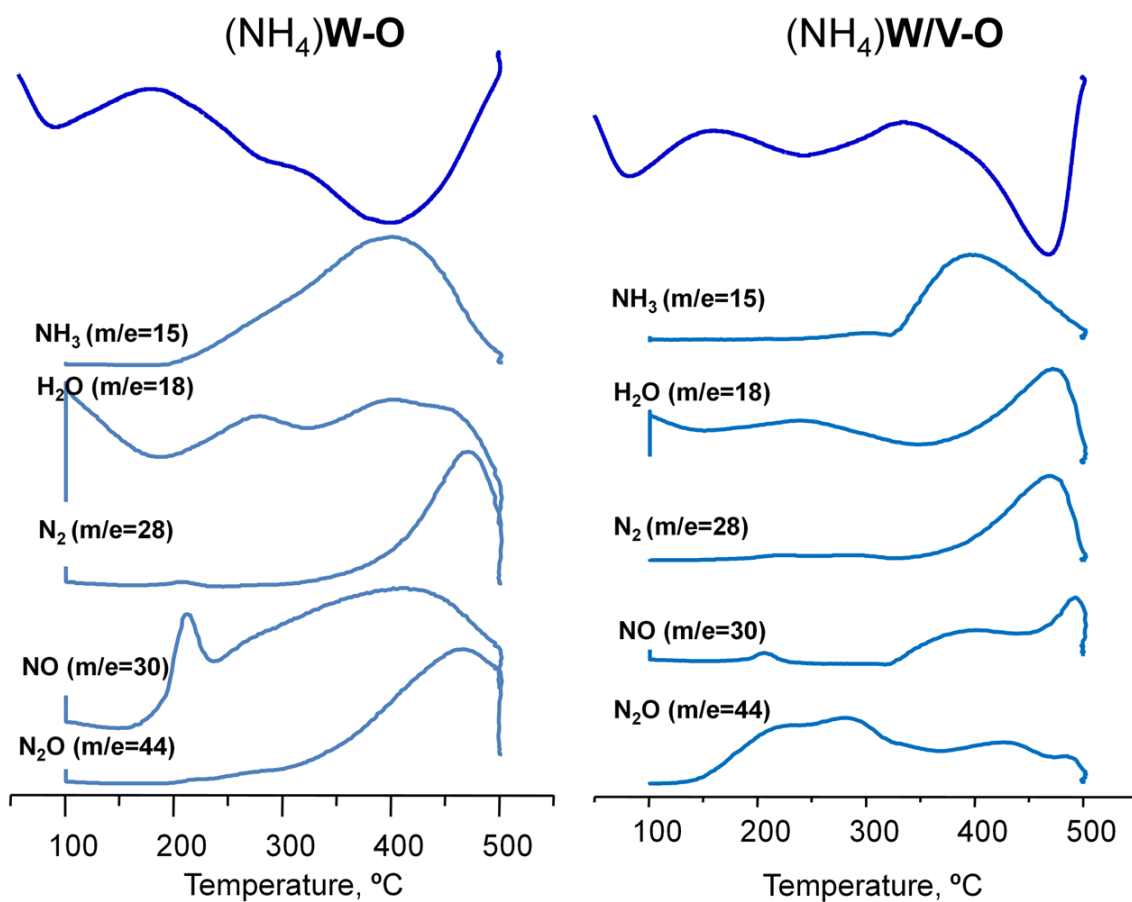

Figure S5. Simultaneous DTA/MS curves of  $(\text{NH}_4)\text{W-O}$  and  $(\text{NH}_4)\text{W/V-O}$  measured in 5%  $\text{O}_2/\text{He}$ .
